# Supplementary material
Source: publisher figshare collection journal article supplement (https://acs.figshare.com/ndownloader/files/11227616)
Supplement: Supplementary file 1 [file 11227616]

## Supporting Information

### Moving beyond the van Krevelen diagram: A new stoichiometric approach for compound classification in organisms.

Albert Rivas-Ubach<sup>1†\*</sup>, Yina Liu<sup>1,2†</sup>, Thomas S. Bianchi<sup>3</sup>, Nikola Tolic<sup>1</sup>, Christer Jansson<sup>1</sup>, Ljiljana Paša-Tolić<sup>1</sup>

1. Environmental Molecular Sciences Division, Pacific Northwest National Laboratory, Richland, 99354, WA, USA.

2. Geochemical and Environmental Research Group, Texas A&M University, College Station, 77845, TX, USA.

3. Department of Geological Sciences, University of Florida, Gainesville, 32611-2120, FL, USA.

† Authors contributed equally to this manuscript.

#### \* Author of correspondence:

Albert Rivas-Ubach  
Environmental Molecular Sciences Division,  
Pacific Northwest National Laboratory,  
Richland, WA, USA, 99354  
Tel: 971 319 5962  
e-mail: [albert.rivas.ubach@gmail.com](mailto:albert.rivas.ubach@gmail.com)

#### Table of Contents

|                                                                                         |     |
|-----------------------------------------------------------------------------------------|-----|
| Supplementary text .....                                                                | S2  |
| Considerations of the compound databases and for the determination of the MSCC .....    | S2  |
| Validation of MSCC threshold computation .....                                          | S4  |
| Additional validation of the MSCC performance .....                                     | S5  |
| Formula assignment error determination of Compound Identification Algorithm (CIA) ..... | S6  |
| R script for compound classification .....                                              | S7  |
| Supplementary Tables .....                                                              | S12 |
| Table S-1 .....                                                                         | S12 |
| Table S-2 .....                                                                         | S15 |
| Table S-3 .....                                                                         | S18 |
| Supplementary Figures .....                                                             | S19 |
| Figure S-1 .....                                                                        | S19 |
| Figure S-2 .....                                                                        | S20 |
| Figure S-3 .....                                                                        | S21 |
| Figure S-4 .....                                                                        | S22 |
| Figure S-5 .....                                                                        | S23 |
| Figure S-6 .....                                                                        | S24 |
| Figure S-7 .....                                                                        | S25 |
| Figure S-8 .....                                                                        | S26 |
| Figure S-9 .....                                                                        | S27 |
| Figure S-10 .....                                                                       | S28 |
| References Supporting Information .....                                                 | S29 |

## **Supplementary text**

### **Considerations of the compound databases and for the determination of the MSCC.**

The stoichiometry and elements for different compound categories were examined to establish the MSCC thresholds with a minimum overlap between compound categories (Figure S-2). Below we describe some aspects of the databases that had to be considered before determining the MSCC thresholds.

**Carbohydrates** (amino sugars excluded) is a group of compounds containing only C, O and H. Therefore, it was classified solely based on their H:C and O:C ratios, resembling the classic compound classification by vK diagram. Phosphorylated sugars, with higher O:C ratios, and polysaccharides also match the proposed MSCC defining Carbohydrates<sub>c</sub>. Most polysaccharides (glycogen, cellulose, starch) are composed of 6-carbon monosaccharides with a molecular formula of  $(C_6H_{10}O_5)_n$  and O:C and H:C ratios of 0.83 and 1.66, respectively.

According to the classic definition, **amino-sugars** are monosaccharides with one hydroxyl group (-OH) replaced by an amine group (-NH<sub>2</sub>); however, a large variety of amino-sugar derivatives are still commonly considered amino-sugars. The complexity and diversity of amino-sugar biochemistry makes it challenging to accurately define amino-sugars' characteristics based on databases. The replacement of a hydroxyl group by an amine shifts the O:C ratios to lower values, and thus some amino sugars could be wrongly assigned as peptides or amino-lipids, when considering exclusively their O:C and H:C ratios. Hence, the inclusion of the N:C ratio is necessary to separate amino-sugars from peptides and high O:C amino-lipids. Furthermore, some amino-sugars can undergo multiple reactions to yield structural derivatives that are substantially different from their original parent sugar, and this can largely shift their original O:C, H:C and N:C molecular ratios. It is important to consider that some of these substantial modifications can thus result in molecules that no longer resemble a "typical" sugar found in organisms. For this reason, we excluded the amino-acid derivatives with O:C < 0.6 (typically highly dehydroxylated), N:C > 0.2 (e.g. high degree of replacement of hydroxyl group by amino group for relatively small molecules) and/or amino-acid derivatives containing long-carbon side chains. These excluded compounds represented 14.3% of the molecules considered amino-sugars in databases and mainly represent metabolites with antibiotic properties, specifically istamycins, fortimicins, and sannamycins. The MSCC for A-Sugars<sub>c</sub> is also suitable to properly classified poly-amino-sugars such as chitin and amino-sugar-phosphates.

**Nucleotide** O:C and H:C ratios showed considerable overlap with other compound categories (Figure 1 main text). However, nucleotides can be segregated from the other compound categories if

N:C, C:P, N:P, N, P and S, and the mass range are considered. Yet, we found some nucleotides that, within the classified Nucleotides<sub>c</sub>, also fitted within the stoichiometric constraints of Protein<sub>c</sub> and A-Sugars<sub>c</sub> (Table 2 main text). Contrary, we did not find any peptide from the 93,245 or any amino-sugars from the 142 included in the databases matching the proposed constraints of the Nucleotide<sub>c</sub> indicating that the probability of including a no-nucleotide compound as nucleotide is practically zero. For this reason, any double match found in Nucleotide<sub>c</sub> should be considered exclusively as a nucleotide.

**Lipids, peptides, and phytochemical compounds** showed a large overlap in O:C and H:C ratios (Figure 1 main text). All peptides contain N, but most phytochemical compounds or lipids do not; therefore the N:C ratio is a crucial discriminant variable between Peptides<sub>c</sub> and Lipids<sub>c</sub> and Phytochemical<sub>c</sub> (Figure S-9). On the other hand, H:C ratio is the stoichiometric ratio used to discriminate between Lipids<sub>c</sub> and Phytochemical<sub>c</sub> (Figures S-1, S-2 and S-9). The overlap of O:C and H:C ratios between lipids and phytochemical compounds is largely due to the fact that several secondary metabolites, such as polyketides or prenol lipids, are lipid-related.<sup>1</sup> We also found that all glucosinolates (phytochemical compounds), except those derived from phenylalanine, tyrosine and tryptophan, matched in the A-Sugars<sub>c</sub> (Table 2 main text). Glucosinolates are N and S containing compounds derived from amino acids that cannot be differentiated from amino-sugars.

Alkaloids, found in plants but also isolated from animals, insect, microorganisms, and invertebrates, are a very diverse group of secondary metabolites with large C:H:O:N variability.<sup>2</sup> Contrary to flavonoids, most alkaloids are commonly species-specific,<sup>2</sup> with only a limited number of those compounds present in a single organism.<sup>3</sup> The presence of alkaloids in samples represents thus an insignificant fraction of the total detected compounds; hence, alkaloids were not considered for the determination of MSCC for the Phytochemical<sub>c</sub>.

Isoprenoids (prenol lipids), also known as terpenoids or terpenes, belong to both lipids and phytochemical compound categories,<sup>1</sup> and showed large overlap with Lipids<sub>c</sub> and Phytochemical<sub>c</sub> in vK diagrams (Figure S-10). We found no stoichiometric variable that could efficiently discriminate isoprenoids from lipids and phytochemical compounds. Although most isoprenoids would match into the current vK stoichiometric constraints of Lipids<sub>c</sub> (~80%), we decided to exclude them for the determination of the MSCC for Lipids<sub>c</sub> and Phytochemical<sub>c</sub>. Thus, any isoprenoid compound present in the analyzed samples would be ultimately “correctly” matched into Lipids<sub>c</sub> or Phytochemical<sub>c</sub>.

**Validation of MSCC threshold computation for Lipids<sub>c</sub>, Phytochemical<sub>c</sub> and Protein<sub>c</sub> - the categories showing the largest overlapping across their O:H:C:N:P stoichiometry.**

To validate the robustness of the MSCC threshold, the most determinant stoichiometric thresholds for Lipids<sub>c</sub>, Phytochemical<sub>c</sub> and Protein<sub>c</sub> were determined with 50% of the data from the lipids, phytochemical compounds and peptide databases, respectively. The 50% of compound from each database were randomly selected. Due to the low number of carbohydrates (82), amino-sugars (142), and nucleotides (37) included in the databases for MSCC determination, the validation of the stoichiometric thresholds for those groups using only 50% of the data was not considered; because the compound diversity on those categories (carbohydrates, amino-sugars, nucleotides) is relatively low in databases and thus will not be able to generate robust test results. It should be noted, however, the determination of stoichiometric thresholds for compound classification will be more accurate with more compounds included considered to calculate it.

H:C ratio is the most determinant stoichiometric ratio to separate Lipids from phytochemical compounds with minimum overlapping (Figs. S-2, S-10). We found that, using the 50% of compounds, the H:C boundary with the minimum proportion of compounds from both databases (minimal relative overlapping) was 1.32 (see file S-1). Therefore, the lowest H:C boundary for Lipids<sub>c</sub> would be 1.32, coinciding with the largest H:C boundary for Phytochemical<sub>c</sub>.

N:C ratio is the most determinant stoichiometric ratio for discriminating peptides from lipids, and peptides from phytochemical compounds. The N:C thresholds with the minimal relative overlapping using the 50% of compounds for each group, were 0.126 for Protein<sub>c</sub> vs. Lipids<sub>c</sub>, and for Protein<sub>c</sub> vs. Phytochemical<sub>c</sub> (see file S-1). Therefore, 0.126 was the minimum value for N:C for Protein<sub>c</sub>, and the maximum value for Lipids<sub>c</sub> and Phytochemical<sub>c</sub>.

Those results prove that H:C and N:C ratios, the most determinant stoichiometry to discriminate Lipids<sub>c</sub>, Phytochemical<sub>c</sub> and Protein<sub>c</sub> remained identical if using 50% or 100% of compounds from the databases (see Table 1 of the main manuscript).

**Additional validation of the MSCC performance for Lipids<sub>c</sub>, Phytochemical<sub>c</sub> and Protein<sub>c</sub> - the categories showing the largest overlapping across their O:H:C:N:P stoichiometry.**

The performance of the established thresholds (Table 1 of the main manuscript) of Lipids<sub>c</sub>, Phytochemical<sub>c</sub> and Protein<sub>c</sub>, the compound categories with the largest number of compounds and the largest overlapping across their elemental stoichiometry, were additionally tested by using the elemental stoichiometry of compounds that were not included in the databases utilized for MSCC determination. The performance for the stoichiometric thresholds for Lipids<sub>c</sub> and Phytochemical<sub>c</sub> (oxy-aromatic compounds) were tested by matching 764 and 330 compounds, respectively, from the *HMDB* database (<http://www.hmdb.ca/>) that were not found in the databases used to determine the MSCC (see Table S-1). The performance for Protein<sub>c</sub> stoichiometric thresholds was tested by using 1,200 random peptides from *Swiss-Prot* database (<http://www.uniprot.org/>) that were not previously utilized for MSCC determination.

We found that 96.99% of the lipids from *HMDB* database matched within the stoichiometric constraints of Lipids<sub>c</sub> (Table 1 main text) (0.26% matched into A-Sugar<sub>c</sub>, 0.13% matched into Carbohydrates<sub>c</sub>, 0.79% matched into Phytochemical<sub>c</sub>, 0.92% matched into Protein<sub>c</sub>, and 0.92% did not match any category) (see file S-2). For oxy-aromatic compounds (Phytochemical compounds), 97.27% of the compounds from the *HMDB* database matched into the stoichiometric constraints of Phytochemical<sub>c</sub> of the MSCC (Table 1 main text) (1.8% matched into Lipids<sub>c</sub>, 0.6% matched into Protein<sub>c</sub> and 0.3% did not match any category) (see file S-2). From the 1,200 random peptides from *Swiss-Prot* database that were not utilized for the determination of the MSCC, we found that only 1 peptide did not match to any of the compound categories making thus the 99.92% of peptides matching properly into the Protein<sub>c</sub> of the proposed MSCC (Table 1 main text) (see database S-2).

The performance of the Lipids<sub>c</sub>, Phytochemical<sub>c</sub> and Protein<sub>c</sub> tested with the databases used for their MSCC calculation (Table 2 main manuscript) was, therefore, very similar when using compounds not included in the databases for MSCC determination (see file S-2):

- Lipids<sub>c</sub>: **97.1%** (Table 2 main manuscript; 30,729 total compounds) vs. **96.99%** (with only compounds not included for MSCC determination; 764 total compounds).
- Phytochemical<sub>c</sub>: **96.5%** (Table 2 main manuscript; 7,774 total compounds) vs. **97.27%** (with only compounds not included for MSCC determination; 330 total compounds).
- Protein<sub>c</sub>: **99.9%** (Table 2 main manuscript; 93,245 total compounds) vs. **99.92%** (with only compounds not included for MSCC determination; 1,200 total compounds).

**Formula assignment error determination of Compound Identification Algorithm (CIA).**

The MSCC applies to elemental formulas which are commonly assigned to metabolic features acquired from the samples. Correct elemental formula assignment to metabolic features is thus a critical prerequisite for accurate compound classification and subsequent data interpretation. To assess the final error of MSCC, we used the metabolite database described above to examine the performance of the automated CIA<sup>4</sup> for assigning elemental formulas. All formulas from the database were converted into exact masses before applying the CIA for elemental formula assignment. The CIA results were then compared to the known formulas from the database to determine correct assignment.

Applying the automated compound assignment algorithm<sup>4</sup> to all exact masses of compounds from the databases we found that 96.94% of the masses were correctly assigned, with only 0.21% of compounds not assigned and 2.84% incorrectly assigned. All carbohydrate formulas were correctly assigned, followed by lipids (98.08%), peptides (96.6%; including phosphorylated peptides), and phytochemical compounds (93.67%). An estimated 70.27% and 57.25% of nucleotides and amino sugars were correctly assigned to molecular formulas, respectively, while 21.62% and 34.78% were incorrectly assigned, and 8.11% and 7.97% not assigned (Table S3).

```

199 R script for compound classification of stoichiometric ratios.
200
201 Copy and paste the script below to "R-Studio", "Tinn-R", "RKward" or your favourite R
202 editor/interface:
203
204
205 #####
206 ### MSCC ###
207 #####
208
209 # VARIABLES REQUIRED IN THE DATASET (make sure your dataset includes the following variables with the
210 names as described below; variables need to be in columns and the detected features need to be in rows):
211 # O.C <- O:C ratio column
212 # H.C <- H:C ratio column
213 # N.C <- N:C ratio column
214 # P.C <- P:C ratio column
215 # N.P <- N:P ratio column
216 # O <- O column
217 # N <- N column
218 # P <- P column
219 # S <- S column
220 # Mass <- exact mass column
221
222
223
224 ## THE FOLLOWING 3 SECTIONS HAVE TO BE USED BY THE USER ##
225 # In "R", directories Paths are written with two backslashes "\\".
226 # Example: C:\\DATA\\MSCC\\R\\MSCC_Test.csv
227
228 # Read the DATASET in CSV format containing all the required variables.
229 # Example: C:\\DATA\\MSCC\\R\\MSCC_Test.csv
230 DATASET <- read.csv("Directory_of_the_dataset_in_CSV_File", sep=",", header=T)
231
232 # Specify the directory of the resulting matchin results summary
233 # Example: C:\\DATA\\MSCC\\R\\MSCC_Test_Summary_Table.csv
234 Destination.File.Dataset <- "Directory_of_the_generated_matching_results_in_CSV_Format"
235
236 # Specify the directory for generating a summary of the results in proportions
237 # Example: C:\\DATA\\MSCC\\R\\MSCC_Test_Summary_Proportions_Table.csv
238 Destination.File.Proportions <- "Directory_of_the_summary_proportion_results_in_CSV_Format"
239
240
241
242 ## RUN THE FULL CODE BELOW ##
243
244 ## 1st. STEP – ASSIGNATION OF COMPOUNDS ##
245 # Create a list for each compound category to keep the compound matches
246 list() -> Matching.Lipids
247 list() -> Matching.Carbohydrates
248 list() -> Matching.AminoSugars
249 list() -> Matching.Phytochemical
250 list() -> Matching.Protein.1

```

```

251 list() -> Matching.Protein.2
252 list() -> Matching.Nucleotides
253
254
255 # Loops for each compound category (we perform a single loop for each category to facilitate double matching
256 detection)
257 # LIPID CONSTRAINTS
258 for (i in 1:nrow(DATASET)){
259   if((DATASET[i,]$O.C <= 0.6) &&
260     (DATASET[i,]$H.C >= 1.32) &&
261     (DATASET[i,]$N.C <= 0.126) &&
262     (DATASET[i,]$P.C < 0.35) &&
263     (DATASET[i,]$N.P <= 5)){
264     paste0("Lipid") -> Matching.Lipids[i]
265   } else {
266     paste0("") -> Matching.Lipids[i]
267   }
268 }
269
270 # CARBOHYDRATE CONSTRAINTS
271 for (i in 1:nrow(DATASET)){
272   if((DATASET[i,]$O.C >= 0.8) &&
273     (DATASET[i,]$H.C >= 1.65) &&
274     (DATASET[i,]$H.C < 2.7) &&
275     (DATASET[i,]$N == 0)){
276     paste0("Carbohydrate") -> Matching.Carbohydrates[i]
277   } else {
278     paste0("") -> Matching.Carbohydrates[i]
279   }
280 }
281
282 # AMINO-SUGAR CONSTRAINTS
283 for (i in 1:nrow(DATASET)){
284   if((DATASET[i,]$O.C >= 0.61) &&
285     (DATASET[i,]$H.C >= 1.45) &&
286     (DATASET[i,]$N.C <= 0.2) &&
287     (DATASET[i,]$N.C > 0.07) &&
288     (DATASET[i,]$P.C < 0.3) &&
289     (DATASET[i,]$N.P <= 2) &&
290     (DATASET[i,]$O >= 3) &&
291     (DATASET[i,]$N >= 1)){
292     paste0("Amino.Sugar") -> Matching.AminoSugars[i]
293   } else {
294     paste0("") -> Matching.AminoSugars[i]
295   }
296 }
297
298 # PHYTOCHEMICAL/OXYAROMATIC COMPOUND CONSTRAINTS
299 for (i in 1:nrow(DATASET)){
300   if((DATASET[i,]$O.C <= 1.15) &&
301     (DATASET[i,]$H.C < 1.32) &&
302     (DATASET[i,]$N.C < 0.126) &&
303     (DATASET[i,]$P.C <= 0.2) &&

```



```

304     (DATASET[i,$N.P <= 3)){
305     paste0("Phytochemical.Oxyaromatic.Compound") -> Matching.Phytochemical[i]
306   } else {
307     paste0("") -> Matching.Phytochemical[i]
308   }
309 }
310
311 # PROTEIN (1) CONSTRAINTS
312 for (i in 1:nrow(DATASET)){
313   if((DATASET[i,$O.C > 0.12) &&
314     (DATASET[i,$O.C <= 0.6) &&
315     (DATASET[i,$H.C > 0.9) &&
316     (DATASET[i,$H.C < 2.5) &&
317     (DATASET[i,$N.C >= 0.126) &&
318     (DATASET[i,$N.C <= 0.7) &&
319     (DATASET[i,$P.C < 0.17) &&
320     (DATASET[i,$N >= 1)){
321     paste0("Protein") -> Matching.Protein.1[i]
322   } else {
323     paste0("") -> Matching.Protein.1[i]
324   }
325 }
326
327 # PROTEIN (2) CONSTRAINTS
328 for (i in 1:nrow(DATASET)){
329   if((DATASET[i,$O.C > 0.6) &&
330     (DATASET[i,$O.C <= 1) &&
331     (DATASET[i,$H.C > 1.2) &&
332     (DATASET[i,$H.C < 2.5) &&
333     (DATASET[i,$N.C > 0.2) &&
334     (DATASET[i,$N.C <= 0.7) &&
335     (DATASET[i,$P.C < 0.17) &&
336     (DATASET[i,$N >= 1)){
337     paste0("Protein") -> Matching.Protein.2[i]
338   } else {
339     paste0("") -> Matching.Protein.2[i]
340   }
341 }
342
343 # NUCLEOTIDE CONSTRAINTS
344 for (i in 1:nrow(DATASET)){
345   if((DATASET[i,$O.C >= 0.5) &&
346     (DATASET[i,$O.C < 1.7) &&
347     (DATASET[i,$H.C > 1) &&
348     (DATASET[i,$H.C < 1.8) &&
349     (DATASET[i,$N.C >= 0.2) &&
350     (DATASET[i,$N.C <= 0.5) &&
351     (DATASET[i,$P.C >= 0.1) &&
352     (DATASET[i,$P.C <= 0.35) &&
353     (DATASET[i,$N.P > 0.6) &&
354     (DATASET[i,$N.P <= 5) &&
355     (DATASET[i,$N >= 2) &&
356     (DATASET[i,$P >= 1) &&

```

```

357     (DATASET[i,$S == 0) &&
358     (DATASET[i,$Mass > 305) &&
359     (DATASET[i,$Mass < 523)){
360     paste0("Nucleotide") -> Matching.Nucleotides[i]
361   } else {
362     paste0("") -> Matching.Nucleotides[i]
363   }
364 }
365
366 # Concatenate all lists into a single one
367 Matchings.pasted.01 <- as.list(paste(Matching.Nucleotides, Matching.Carbohydrates, Matching.Lipids,
368 Matching.AminoSugars, Matching.Phytochemical, Matching.Protein.1, Matching.Protein.2))
369
370 # Trim each row of the list (delete "spaces")
371 Matchings.pasted.02 <- as.list(gsub(" ", "", Matchings.pasted.01, fixed =TRUE))
372
373 # Add "Not.Matched" to those cells that were not matched to any compound category
374 Matchings.pasted.02[Matchings.pasted.02==""] <- "Not.Matched"
375
376 # Mark the potential Double Matches
377 # Create a new List
378 Matchings.list <- list()
379
380 # Loop on the generated list (double matchings will be marked by "Double.Matched")
381 for (i in 1:length(Matchings.pasted.02)){
382   if (Matchings.pasted.02[i] == "Lipid"){
383     paste0("Lipid") -> Matchings.list[i]
384   } else if (Matchings.pasted.02[i] == "Carbohydrate"){
385     paste0("Carbohydrate") -> Matchings.list[i]
386   } else if (Matchings.pasted.02[i] == "Amino.Sugar"){
387     paste0("Amino.Sugar") -> Matchings.list[i]
388   } else if (Matchings.pasted.02[i] == "Phytochemical.Oxyaromatic.Compound"){
389     paste0("Phytochemical.Oxyaromatic.Compound") -> Matchings.list[i]
390   } else if (Matchings.pasted.02[i] == "Protein"){
391     paste0("Protein") -> Matchings.list[i]
392   } else if (Matchings.pasted.02[i] == "Nucleotide"){
393     paste0("Nucleotide") -> Matchings.list[i]
394   } else if (Matchings.pasted.02[i] == "Not.Matched"){
395     paste0("Not.Matched") -> Matchings.list[i]
396   } else {
397     paste0(paste("Double.Match_",Matchings.pasted.02[i])) -> Matchings.list[i]
398   }
399 }
400
401 Matchings <- as.data.frame(do.call(rbind, Matchings.list))
402
403 Matchings[Matchings == "Double.Match_NucleotideProtein"] <- "Nucleotide" # Double matches with
404 nucleotides will be Nucleotides
405 Matchings[Matchings == "Double.Match_NucleotideAmino.Sugar"] <- "Nucleotide" # Double matches with
406 nucleotides will be Nucleotides
407 DATASET.MATCHED <- DATASET
408 DATASET.MATCHED["Compound.Match"] <- Matchings # Add a new column called "Compound.Match" into the
409 DATASET.

```

```

410
411 # SAVE DATASET INTO A CSV FILE
412 write.table(data.frame(DATASET.MATCHED), file= Destination.File.Dataset)
413
414
415
416 ## 2nd STEP - CALCULATE THE PROPORTIONS OF EACH COMPOUND CATEGORY ##
417 Protein.Proportion <- length(which(Matchings == "Protein"))/nrow(Matchings)*100
418 Phytochemical.Oxyaromatic.Compound.Proportion <- length(which(Matchings ==
419 "Phytochemical.Oxyaromatic.Compound"))/nrow(Matchings)*100
420 Lipid.Proportion <- length(which(Matchings == "Lipid"))/nrow(Matchings)*100
421 Carbohydrate.Proportion <- length(which(Matchings == "Carbohydrate"))/nrow(Matchings)*100
422 Amino.Sugar.Proportion <- length(which(Matchings == "Amino.Sugar"))/nrow(Matchings)*100
423 Nucleotide.Proportion <- length(which(Matchings == "Nucleotide"))/nrow(Matchings)*100
424 Not.Matched.Proportion <- length(which(Matchings == "Not.Matched"))/nrow(Matchings)*100
425 Double.Matched.Proportion <- length(which(Matchings != "Protein" & Matchings !=
426 "Phytochemical.Oxyaromatic.Compound" & Matchings != "Lipid" & Matchings != "Carbohydrate" & Matchings
427 != "Amino.Sugar" & Matchings != "Nucleotide" & Matchings != "Not.Matched"))/nrow(Matchings)*100 #
428 Including double matches
429
430 # Integrate all the proportions together into a single categorical vector
431 Compound.Proportions <- c(Carbohydrate.Proportion, Amino.Sugar.Proportion, Nucleotide.Proportion,
432 Lipid.Proportion, Protein.Proportion, Phytochemical.Oxyaromatic.Compound.Proportion,
433 Not.Matched.Proportion, Double.Matched.Proportion)
434
435 # Create a Data Frame with the proportions
436 Compound.Proportions.DF <- as.data.frame(Compound.Proportions)
437
438 # Create the Labels for each proportion (has to follow the same order as the integration of the proportions)
439 Labels <- c("Carbohydrates", "Amino.Sugars", "Nucleotides", "Lipids", "Proteins",
440 "Phytochemical.Oxyaromatic.Compounds", "Not.Matched", "Double.Matched")
441
442 # Add a new column into the Data Frame with the name of the compounds
443 Compound.Proportions.DF["Compound"] <- Labels
444
445 # SAVE DATASET INTO A CSV FILE
446 write.table(data.frame(Compound.Proportions.DF), file= Destination.File.Proportions)
447
448
449
450 ## 3rd STEP - PIE CHART OF THE COMPOUND PROPORTIONS ##
451 # Constrain the number of decimals to 2
452 Pie.Proportions <- list()
453 for (i in 1:length(Compound.Proportions.DF$Compound.Proportions)){
454   format(round(Compound.Proportions.DF$Compound.Proportions[i], 2), nsmall=2) -> Pie.Proportions[i]
455 }
456
457 # Create the labels for the Pie Chart
458 Labels.Plot <- paste (Labels, Pie.Proportions) # Add The percentage value to each label.
459 Labels.Plot.2 <- paste(Labels.Plot,"%", sep="") # Add "%" to each label.
460
461 # Plot the Pie Chart
462 pie(Compound.Proportions, labels = Labels.Plot.2, col= rainbow(length(Labels.Plot.2)))

```

463 **Supplementary Tables**

464 **Table S-1.** Compounds included in each of the online examined databases (lipids, amino sugars,  
 465 phytochemical compounds, carbohydrates and nucleotides) and the corresponding source.

| <b>Lipids (Source: LipidMAP)</b> |                                              |
|----------------------------------|----------------------------------------------|
| Fatty Acyls [FA]                 | Docosanoids [FA04]                           |
|                                  | Eicosanoids [FA03]                           |
|                                  | Acyltrehaloses [SL03]                        |
|                                  | Fatty Acids and Conjugates [FA01]            |
|                                  | Fatty acyl glycosides [FA13]                 |
|                                  | Fatty alcohols [FA05]                        |
|                                  | Fatty aldehydes [FA06]                       |
|                                  | Fatty amides [FA08]                          |
|                                  | Fatty esters [FA07]                          |
|                                  | Hydrocarbons [FA11]                          |
|                                  | Octadecanoids [FA02]                         |
|                                  | Oxygenated hydrocarbons [FA12]               |
|                                  |                                              |
| Glycerolipids [GL]               | Diradylglycerols [GL02]                      |
|                                  | Glycosyldiradylglycerols [GL05]              |
|                                  | Glycosylmonoradylglycerols [GL04]            |
|                                  | Monoradylglycerols [GL01]                    |
|                                  | Triradylglycerols [GL03]                     |
| Glycerophospholipids [GP]        | CDP-Glycerols [GP13]                         |
|                                  | Glycerophosphates [GP10]                     |
|                                  | Glycerophosphocholines [GP01]                |
|                                  | Glycerophosphoethanolamines [GP02]           |
|                                  | Glycerophosphoinositols [GP06]               |
|                                  | Glycerophosphoglycerols [GP04]               |
|                                  | Glycerophosphoglycerophosphoglycerols [GP12] |
|                                  | Glycerophosphoinositol bisphosphates [GP08]  |
|                                  | Glycerophosphoinositol monophosphates [GP07] |
|                                  | Glycerophosphoinositol trisphosphates [GP09] |
|                                  | Glycerophosphoinositolglycans [GP15]         |
|                                  | Glycosylglycerophospholipids [GP14]          |
|                                  | Glycerophosphoserines [GP03]                 |
|                                  | Glyceropyrophosphates [GP11]                 |
|                                  | Oxidized glycerophospholipids [GP20]         |
| Prenol Lipids [PR]               | Quinones and hydroquinones [PR02]            |
|                                  | Polyprenols [PR03]                           |
| Saccharolipids [SL]              | Acylaminosugar glycans [SL02]                |
|                                  | Acylaminosugars [SL01]                       |
|                                  | Acyltrehaloses [SL03]                        |
|                                  | Other acyl sugars [SL05]                     |
| Sphingolipids [SP]               | Ceramides [SP02]                             |
|                                  | Neutral glycosphingolipids [SP05]            |
|                                  | Phosphosphingolipids [SP04]                  |
|                                  | Phosphosphingolipids [SP03]                  |
|                                  | Sphingoid bases [SP01]                       |
| Sterol Lipids [ST]               | Bile acids and derivatives [ST04]            |

|                                                             |                                                                                                                                                                                                                                                                                                                                                                                                                                                                      |
|-------------------------------------------------------------|----------------------------------------------------------------------------------------------------------------------------------------------------------------------------------------------------------------------------------------------------------------------------------------------------------------------------------------------------------------------------------------------------------------------------------------------------------------------|
|                                                             | Secosteroids [ST03]                                                                                                                                                                                                                                                                                                                                                                                                                                                  |
|                                                             | Steroid conjugates [ST05]                                                                                                                                                                                                                                                                                                                                                                                                                                            |
|                                                             | Steroids [ST02]                                                                                                                                                                                                                                                                                                                                                                                                                                                      |
|                                                             | Sterols [ST01]                                                                                                                                                                                                                                                                                                                                                                                                                                                       |
| <b>Phytochemical Compounds (Sources: LipidMAP and KEGG)</b> |                                                                                                                                                                                                                                                                                                                                                                                                                                                                      |
| <b>From LipidMAP</b>                                        |                                                                                                                                                                                                                                                                                                                                                                                                                                                                      |
| Polyketides [PK]                                            | Linear polyketides [PK01]                                                                                                                                                                                                                                                                                                                                                                                                                                            |
|                                                             | Halogenated acetogenins [PK02]                                                                                                                                                                                                                                                                                                                                                                                                                                       |
|                                                             | Annonaceae acetogenins [PK03]                                                                                                                                                                                                                                                                                                                                                                                                                                        |
|                                                             | Macrolides and lactone polyketides [PK04]                                                                                                                                                                                                                                                                                                                                                                                                                            |
|                                                             | Ansamycins and related polyketides [PK05]                                                                                                                                                                                                                                                                                                                                                                                                                            |
|                                                             | Polyenes [PK06]                                                                                                                                                                                                                                                                                                                                                                                                                                                      |
|                                                             | Linear tetracyclines [PK07]                                                                                                                                                                                                                                                                                                                                                                                                                                          |
|                                                             | Polyether antibiotics [PK09]                                                                                                                                                                                                                                                                                                                                                                                                                                         |
|                                                             | Aflatoxins and related substances [PK10]                                                                                                                                                                                                                                                                                                                                                                                                                             |
|                                                             | Cytochalasins [PK11]                                                                                                                                                                                                                                                                                                                                                                                                                                                 |
|                                                             | Flavonoids [PK12]                                                                                                                                                                                                                                                                                                                                                                                                                                                    |
|                                                             | Aromatic polyketides [PK13]                                                                                                                                                                                                                                                                                                                                                                                                                                          |
| Prenol Lipids [PR]                                          | Hopanoids [PR04]                                                                                                                                                                                                                                                                                                                                                                                                                                                     |
| <b>From KEGG</b>                                            |                                                                                                                                                                                                                                                                                                                                                                                                                                                                      |
| Flavonoids                                                  | Flavonoids                                                                                                                                                                                                                                                                                                                                                                                                                                                           |
|                                                             | Isoflavonoids                                                                                                                                                                                                                                                                                                                                                                                                                                                        |
|                                                             | Complex flavonoids                                                                                                                                                                                                                                                                                                                                                                                                                                                   |
|                                                             | Monolignols                                                                                                                                                                                                                                                                                                                                                                                                                                                          |
|                                                             | Lignans                                                                                                                                                                                                                                                                                                                                                                                                                                                              |
|                                                             | Coumarins                                                                                                                                                                                                                                                                                                                                                                                                                                                            |
| Skimate / acetate                                           | malonate pathway derived compounds                                                                                                                                                                                                                                                                                                                                                                                                                                   |
| Polyketides                                                 | Anthraquinones                                                                                                                                                                                                                                                                                                                                                                                                                                                       |
|                                                             | Pyrones                                                                                                                                                                                                                                                                                                                                                                                                                                                              |
|                                                             | Others                                                                                                                                                                                                                                                                                                                                                                                                                                                               |
| Fatty acids related compounds                               | Fatty acids                                                                                                                                                                                                                                                                                                                                                                                                                                                          |
| Amino acid related compounds                                | Betalains                                                                                                                                                                                                                                                                                                                                                                                                                                                            |
|                                                             | Cyanogenic glucosides                                                                                                                                                                                                                                                                                                                                                                                                                                                |
|                                                             | Glucosinolates                                                                                                                                                                                                                                                                                                                                                                                                                                                       |
|                                                             | Others                                                                                                                                                                                                                                                                                                                                                                                                                                                               |
| Others                                                      | Naphthoquinones                                                                                                                                                                                                                                                                                                                                                                                                                                                      |
|                                                             | Tannins and galloyl derivatives                                                                                                                                                                                                                                                                                                                                                                                                                                      |
| <b>Amino-Sugars (Sources: KEGG and ChEBI)</b>               |                                                                                                                                                                                                                                                                                                                                                                                                                                                                      |
| <b>From KEGG</b>                                            | Amino sugars                                                                                                                                                                                                                                                                                                                                                                                                                                                         |
| <b>From ChEBI</b>                                           | 15993, 16062, 16173, 16702, 17122, 17274, 17316, 17411, 17446, 17911, 18207, 18232, 21615, 21977, 24108, 25505, 27438, 27459, 27465, 27503, 27625, 28000, 28132, 28207, 28255, 28401, 28761, 28879, 28944, 28945, 28999, 29006, 29025, 29711, 31747, 31748, 32570, 32571, 32572, 35418, 39610, 44230, 46991, 47966, 47968, 47987, 52079, 52426, 57832, 59239, 59277, 59732, 59986, 61033, 61437, 62169, 62325, 63120, 63153, 63287, 64888, 68682, 7125, 7203, 72626, |

|                                     |                                                                                                                              |
|-------------------------------------|------------------------------------------------------------------------------------------------------------------------------|
|                                     | 72725, 73783, 79970, 79971, 81450, 83930, 84560, 84569, 84941, 85106, 87176, 87177, 87178, 87179, 87180, 87313, 88130, 95151 |
| <b>Carbohydrates (Source: KEGG)</b> |                                                                                                                              |
| Monosaccharides                     | Aldoses                                                                                                                      |
|                                     | Ketoses                                                                                                                      |
|                                     | Deoxy sugars                                                                                                                 |
|                                     | Sugar acids                                                                                                                  |
|                                     | Sugar alcohols                                                                                                               |
| Oligosaccharides                    | Disaccharides                                                                                                                |
|                                     | Tetrasaccharides                                                                                                             |
| <b>Nucleotides (Source: KEGG)</b>   |                                                                                                                              |
| Nucleotides                         | Ribonucleotides                                                                                                              |
|                                     | Deoxyribonucleotides                                                                                                         |
|                                     | Cyclic nucleotides                                                                                                           |

466

467

468

469

470

471

472

473

474

475

476

477

478

479

**Table S-2.** Proportions of compounds from databases that correctly matched (CM), not matched (NM), incorrectly matched (IM), and double matched (DM) with lipids, protein, amino sugar and carbohydrate categories delimited by our constraints (Table 1 of main text) or the O:C and H:C constraints proposed for other 21 studies. Each of the 21 bibliographical studies is referenced with a different number and the citations are placed as a footnote. The proportions of IM considering DM as incorrect match ( $IM_{+DM}$ ), the CM without consider the NM and DM ( $CM_{-(NM+DM)}$ ) and the  $CM/IM_{+DM}$  and  $CM/(IM_{+DM} + NM)$  ratios are also shown. The total proportions and ratios considering all categories together are shown and are based on the absolute number of compounds in databases and on the relative number of compounds.

|                 | Study number (references as footnote) |       |       |       |       |       |       |       |       |       |       |       |       |       |       |       |       |       |       |       |       |       |
|-----------------|---------------------------------------|-------|-------|-------|-------|-------|-------|-------|-------|-------|-------|-------|-------|-------|-------|-------|-------|-------|-------|-------|-------|-------|
|                 | Present study                         | 1.    | 2.    | 3.    | 4.    | 5.    | 6.    | 7.    | 8.    | 9.    | 10.   | 11.   | 12.   | 13.   | 14.   | 15.   | 16.   | 17.   | 18.   | 19.   | 20.   | 21.   |
| Lipids          |                                       |       |       |       |       |       |       |       |       |       |       |       |       |       |       |       |       |       |       |       |       |       |
| CM (%)          | 97.05                                 | 17.45 | 53.10 | 26.35 | 9.13  | 58.92 | 77.98 | 34.51 | 33.36 | 75.00 | 62.35 | 25.29 | 49.21 | 72.92 | 24.77 | 29.26 | 27.73 | 66.18 | 36.98 | 25.81 | 23.93 | 58.30 |
| IM (%)          | 1.67                                  | 1.81  | 4.95  | 30.44 | 39.03 | 34.58 | 12.09 | 25.58 | 12.10 | 18.35 | 17.63 | 1.23  | 11.05 | 3.87  | 6.44  | 39.19 | 16.11 | 11.74 | 25.59 | 8.29  | 35.52 | 23.97 |
| NM (%)          | 1.28                                  | 80.74 | 41.94 | 34.25 | 51.83 | 3.60  | 9.59  | 38.21 | 54.54 | 6.33  | 20.02 | 73.48 | 39.74 | 23.21 | 3.19  | 31.54 | 56.16 | 22.07 | 37.43 | 65.90 | 28.05 | 17.71 |
| DM (%)          | 0.00                                  | 0.00  | 0.00  | 8.96  | 0.01  | 2.90  | 0.34  | 1.70  | 0.00  | 0.33  | 0.00  | 0.00  | 0.00  | 0.00  | 65.60 | 0.00  | 0.00  | 0.00  | 0.00  | 0.00  | 12.50 | 0.01  |
| IM+DM (%)       | 1.67                                  | 1.81  | 4.95  | 39.40 | 39.04 | 37.48 | 12.43 | 27.28 | 12.10 | 18.67 | 17.63 | 1.23  | 11.05 | 3.87  | 72.04 | 39.19 | 16.11 | 11.74 | 25.59 | 8.29  | 48.02 | 23.99 |
| CM-(NM+DM) (%)  | 98.31                                 | 90.59 | 91.47 | 46.40 | 18.96 | 63.02 | 86.58 | 57.43 | 73.38 | 80.35 | 77.96 | 95.35 | 81.67 | 94.96 | 79.36 | 42.75 | 63.26 | 84.93 | 59.10 | 75.68 | 40.25 | 70.86 |
| CM/IM+DM        | 58.13                                 | 9.63  | 10.72 | 0.67  | 0.23  | 1.57  | 6.27  | 1.27  | 2.76  | 4.02  | 3.54  | 20.50 | 4.45  | 18.85 | 0.34  | 0.75  | 1.72  | 5.64  | 1.45  | 3.11  | 0.50  | 2.43  |
| CM/(IM+DM + NM) | 32.92                                 | 0.21  | 1.13  | 0.36  | 0.10  | 1.43  | 3.54  | 0.53  | 0.50  | 3.00  | 1.66  | 0.34  | 0.97  | 2.69  | 0.33  | 0.41  | 0.38  | 1.96  | 0.59  | 0.35  | 0.31  | 1.40  |
|                 |                                       |       |       |       |       |       |       |       |       |       |       |       |       |       |       |       |       |       |       |       |       |       |
| Peptides        |                                       |       |       |       |       |       |       |       |       |       |       |       |       |       |       |       |       |       |       |       |       |       |
| CM (%)          | 99.89                                 | 13.74 | 17.90 | 72.44 | 68.03 | 65.25 | 37.53 | 56.00 | 43.59 | 55.69 | 45.50 | 17.29 | 24.70 | 14.21 | 32.02 | 31.39 | 16.76 | 19.34 | 61.13 | 15.70 | 66.11 | 64.49 |
| IM (%)          | 0.01                                  | 0.29  | 7.24  | 3.30  | 2.55  | 7.14  | 26.19 | 2.95  | 0.82  | 22.36 | 10.26 | 5.36  | 1.49  | 30.79 | 0.97  | 10.45 | 1.44  | 10.71 | 2.40  | 4.24  | 0.63  | 6.59  |
| NM (%)          | 0.10                                  | 85.98 | 74.86 | 23.00 | 29.34 | 26.80 | 35.58 | 40.57 | 55.59 | 20.94 | 44.24 | 77.36 | 73.81 | 55.00 | 0.02  | 58.15 | 81.79 | 69.95 | 36.47 | 80.06 | 32.99 | 28.81 |
| DM (%)          | 0.00                                  | 0.00  | 0.00  | 1.25  | 0.08  | 0.82  | 0.70  | 0.49  | 0.00  | 1.01  | 0.00  | 0.00  | 0.00  | 0.00  | 66.99 | 0.00  | 0.00  | 0.00  | 0.00  | 0.00  | 0.27  | 0.11  |
| IM+DM (%)       | 0.01                                  | 0.29  | 7.24  | 4.55  | 2.63  | 7.95  | 26.89 | 3.43  | 0.82  | 23.37 | 10.26 | 5.36  | 1.49  | 30.79 | 67.96 | 10.45 | 1.44  | 10.71 | 2.40  | 4.24  | 0.90  | 6.70  |
| CM-(NM+DM) (%)  | 99.99                                 | 97.94 | 71.20 | 95.64 | 96.39 | 90.14 | 58.90 | 95.00 | 98.16 | 71.35 | 81.61 | 76.35 | 94.32 | 31.58 | 97.05 | 75.02 | 92.07 | 64.37 | 96.22 | 78.74 | 99.05 | 90.73 |
| CM/IM+DM        | 7761.83                               | 47.61 | 2.47  | 15.91 | 25.89 | 8.20  | 1.40  | 16.31 | 53.20 | 2.38  | 4.44  | 3.23  | 16.62 | 0.46  | 0.47  | 3.00  | 11.61 | 1.81  | 25.42 | 3.70  | 73.21 | 9.62  |
| CM/(IM+DM + NM) | 904.29                                | 0.16  | 0.22  | 2.63  | 2.13  | 1.88  | 0.60  | 1.27  | 0.77  | 1.26  | 0.83  | 0.21  | 0.33  | 0.17  | 0.47  | 0.46  | 0.20  | 0.24  | 1.57  | 0.19  | 1.95  | 1.82  |
|                 |                                       |       |       |       |       |       |       |       |       |       |       |       |       |       |       |       |       |       |       |       |       |       |
| Amino Sugars    |                                       |       |       |       |       |       |       |       |       |       |       |       |       |       |       |       |       |       |       |       |       |       |
| CM (%)          | 98.59                                 |       |       | 9.15  | 6.34  | 11.97 | 4.93  | 6.34  |       | 22.54 | 4.93  |       |       |       |       |       |       | 16.20 | 6.34  |       |       | 4.93  |
| IM (%)          | 0.00                                  |       |       | 35.21 | 42.25 | 50.00 | 55.63 | 0.00  |       | 0.00  | 46.48 |       |       |       |       |       |       | 13.38 | 38.73 |       |       | 0.00  |

|                                                                                                                                    |        |        |        |        |       |       |        |        |        |        |        |        |        |        |       |        |        |       |        |        |        |
|------------------------------------------------------------------------------------------------------------------------------------|--------|--------|--------|--------|-------|-------|--------|--------|--------|--------|--------|--------|--------|--------|-------|--------|--------|-------|--------|--------|--------|
| NM (%)                                                                                                                             | 1.41   |        |        | 48.59  | 51.41 | 38.03 | 39.44  | 93.66  |        | 77.46  | 48.59  |        |        |        |       |        | 70.42  | 54.93 |        |        | 95.07  |
| DM (%)                                                                                                                             | 0.00   |        |        | 7.04   | 0.00  | 0.00  | 0.00   | 0.00   |        | 0.00   | 0.00   |        |        |        |       |        | 0.00   | 0.00  |        |        | 0.00   |
| IM+DM (%)                                                                                                                          | 0.00   |        |        | 42.25  | 42.25 | 50.00 | 55.63  | 0.00   |        | 0.00   | 46.48  |        |        |        |       |        | 13.38  | 38.73 |        |        | 0.00   |
| CM-(NM+DM) (%)                                                                                                                     | 100.00 |        |        | 20.63  | 13.04 | 19.32 | 8.14   | 100.00 |        | 100.00 | 9.59   |        |        |        |       |        | 54.76  | 14.06 |        |        | 100.00 |
| CM/IM+DM                                                                                                                           | ∞      |        |        | 0.22   | 0.15  | 0.24  | 0.09   | ∞      |        | ∞      | 0.11   |        |        |        |       |        | 1.21   | 0.16  |        |        | ∞      |
| CM/(IM+DM + NM)                                                                                                                    | 70.00  |        |        | 0.10   | 0.07  | 0.14  | 0.05   | 0.07   |        | 0.29   | 0.05   |        |        |        |       |        | 0.19   | 0.07  |        |        | 0.05   |
| <b>Carbohydrates</b>                                                                                                               |        |        |        |        |       |       |        |        |        |        |        |        |        |        |       |        |        |       |        |        |        |
| CM (%)                                                                                                                             | 98.78  | 6.10   | 6.10   | 82.93  | 82.93 | 86.59 | 93.90  |        | 4.88   |        | 82.93  | 28.05  | 39.02  | 4.88   | 97.56 | 1.22   | 35.37  | 34.15 | 82.93  | 39.02  | 37.80  |
| IM (%)                                                                                                                             | 0.00   | 0.00   | 0.00   | 0.00   | 1.22  | 1.22  | 0.00   |        | 0.00   |        | 0.00   | 0.00   | 0.00   | 0.00   | 1.22  | 0.00   | 0.00   | 1.22  | 0.00   | 0.00   | 0.00   |
| NM (%)                                                                                                                             | 1.22   | 93.90  | 93.90  | 17.07  | 15.85 | 12.20 | 6.10   |        | 95.12  |        | 17.07  | 71.95  | 60.98  | 95.12  | 1.22  | 98.78  | 64.63  | 64.63 | 17.07  | 60.98  | 62.20  |
| DM (%)                                                                                                                             | 0.00   | 0.00   | 0.00   | 0.00   | 0.00  | 0.00  | 0.00   |        | 0.00   |        | 0.00   | 0.00   | 0.00   | 0.00   | 0.00  | 0.00   | 0.00   | 0.00  | 0.00   | 0.00   | 0.00   |
| IM+DM (%)                                                                                                                          | 0.00   | 0.00   | 0.00   | 0.00   | 1.22  | 1.22  | 0.00   |        | 0.00   |        | 0.00   | 0.00   | 0.00   | 0.00   | 1.22  | 0.00   | 0.00   | 1.22  | 0.00   | 0.00   | 0.00   |
| CM-(NM+DM) (%)                                                                                                                     | 100.00 | 100.00 | 100.00 | 100.00 | 98.55 | 98.61 | 100.00 |        | 100.00 |        | 100.00 | 100.00 | 100.00 | 100.00 | 98.77 | 100.00 | 100.00 | 96.55 | 100.00 | 100.00 | 100.00 |
| CM/IM+DM                                                                                                                           | ∞      | ∞      | ∞      | ∞      | 68.00 | 71.00 | ∞      |        | ∞      |        | ∞      | ∞      | ∞      | ∞      | 80.00 | ∞      | ∞      | 28.00 | ∞      | ∞      | ∞      |
| CM/(IM+DM + NM)                                                                                                                    | 81.00  | 0.06   | 0.06   | 4.86   | 4.86  | 6.45  | 15.40  |        | 0.05   |        | 4.86   | 0.39   | 0.64   | 0.05   | 40.00 | 0.01   | 0.55   | 0.52  | 4.86   | 0.64   | 0.61   |
| <b>Total Absolute (according to the total absolute number of metabolites)</b>                                                      |        |        |        |        |       |       |        |        |        |        |        |        |        |        |       |        |        |       |        |        |        |
| <b>For those studies with no amino sugar or carbohydrate category; those clases were not considered for computation of totals.</b> |        |        |        |        |       |       |        |        |        |        |        |        |        |        |       |        |        |       |        |        |        |
| CM (%)                                                                                                                             | 99.19  | 14.63  | 26.58  | 60.98  | 53.40 | 63.64 | 47.54  | 50.62  | 40.98  | 60.43  | 49.65  | 19.25  | 30.75  | 28.71  | 30.23 | 30.81  | 19.47  | 30.94 | 55.11  | 18.20  | 55.58  |
| IM (%)                                                                                                                             | 0.42   | 0.70   | 6.68   | 10.05  | 11.62 | 13.97 | 22.72  | 8.55   | 3.63   | 21.34  | 12.12  | 4.36   | 3.91   | 24.09  | 2.40  | 17.57  | 5.10   | 10.96 | 8.18   | 5.28   | 9.31   |
| NM (%)                                                                                                                             | 0.39   | 84.67  | 66.74  | 25.81  | 34.92 | 21.06 | 29.13  | 40.04  | 55.39  | 17.38  | 38.23  | 76.39  | 65.35  | 47.20  | 0.84  | 51.62  | 75.43  | 58.10 | 36.71  | 76.52  | 31.82  |
| DM (%)                                                                                                                             | 0.00   | 0.00   | 0.00   | 3.16   | 0.06  | 1.33  | 0.61   | 0.79   | 0.00   | 0.84   | 0.00   | 0.00   | 0.00   | 0.00   | 66.52 | 0.00   | 0.00   | 0.00  | 0.00   | 0.00   | 3.30   |
| IM+DM (%)                                                                                                                          | 0.42   | 0.70   | 6.68   | 13.21  | 11.68 | 15.30 | 23.33  | 9.33   | 3.63   | 22.18  | 12.12  | 4.36   | 3.91   | 24.09  | 68.93 | 17.57  | 5.10   | 10.96 | 8.18   | 5.28   | 12.60  |
| CM-(NM+DM) (%)                                                                                                                     | 99.58  | 95.46  | 79.92  | 85.85  | 82.13 | 82.00 | 67.66  | 85.46  | 91.86  | 73.84  | 80.38  | 81.54  | 88.73  | 54.38  | 92.64 | 63.68  | 79.26  | 73.84 | 87.07  | 77.52  | 85.66  |
| CM/IM+DM                                                                                                                           | 234.64 | 21.01  | 3.98   | 4.61   | 4.57  | 4.16  | 2.04   | 5.42   | 11.29  | 2.72   | 4.10   | 4.42   | 7.87   | 1.19   | 0.44  | 1.75   | 3.82   | 2.82  | 6.74   | 3.45   | 4.41   |
| CM/(IM+DM + NM)                                                                                                                    | 121.73 | 0.17   | 0.36   | 1.56   | 1.15  | 1.75  | 0.91   | 1.03   | 0.69   | 1.53   | 0.99   | 0.24   | 0.44   | 0.40   | 0.43  | 0.45   | 0.24   | 0.45  | 1.23   | 0.22   | 1.25   |
| <b>Total Relative (giving the same weight to each database independently of the number of metabolites included in each one)</b>    |        |        |        |        |       |       |        |        |        |        |        |        |        |        |       |        |        |       |        |        |        |
| <b>For those studies with no amino sugar or carbohydrate category; those clases were not considered for computation of totals.</b> |        |        |        |        |       |       |        |        |        |        |        |        |        |        |       |        |        |       |        |        |        |
| CM (%)                                                                                                                             | 98.58  | 12.43  | 25.70  | 47.72  | 41.61 | 55.68 | 53.59  | 32.28  | 27.28  | 51.08  | 48.93  | 23.54  | 37.65  | 30.67  | 51.45 | 20.62  | 26.62  | 33.97 | 46.84  | 26.84  | 42.61  |
| IM (%)                                                                                                                             | 0.42   | 0.70   | 4.06   | 17.24  | 21.26 | 23.23 | 23.48  | 9.51   | 4.31   | 13.57  | 18.59  | 2.20   | 4.18   | 11.55  | 2.88  | 16.55  | 5.85   | 9.26  | 16.68  | 4.18   | 12.05  |
| NM (%)                                                                                                                             | 0.88   | 86.87  | 70.23  | 30.73  | 37.11 | 20.15 | 22.68  | 57.48  | 68.42  | 34.91  | 32.48  | 74.26  | 58.18  | 57.78  | 1.48  | 62.83  | 67.53  | 56.77 | 36.48  | 68.98  | 41.08  |
| DM (%)                                                                                                                             | 0.00   | 0.00   | 0.00   | 4.31   | 0.02  | 0.93  | 0.26   | 0.73   | 0.00   | 0.45   | 0.00   | 0.00   | 0.00   | 0.00   | 44.20 | 0.00   | 0.00   | 0.00  | 0.00   | 0.00   | 4.26   |
| IM+DM (%)                                                                                                                          | 0.42   | 0.70   | 4.06   | 21.55  | 21.29 | 24.16 | 23.74  | 10.24  | 4.31   | 14.01  | 18.59  | 2.20   | 4.18   | 11.55  | 47.07 | 16.55  | 5.85   | 9.26  | 16.68  | 4.18   | 16.31  |
| CM-(NM+DM) (%)                                                                                                                     | 99.57  | 96.18  | 87.56  | 65.67  | 56.74 | 67.77 | 63.40  | 84.14  | 90.51  | 83.90  | 67.29  | 90.57  | 92.00  | 75.51  | 91.73 | 72.59  | 85.11  | 75.15 | 67.35  | 84.81  | 79.77  |



|                 |        |       |      |      |      |      |      |      |      |      |      |       |      |      |       |      |      |      |      |      |      |      |
|-----------------|--------|-------|------|------|------|------|------|------|------|------|------|-------|------|------|-------|------|------|------|------|------|------|------|
| CM/IM+DM        | 234.39 | 17.74 | 6.32 | 2.21 | 1.95 | 2.30 | 2.26 | 3.15 | 6.33 | 3.64 | 2.63 | 10.72 | 9.01 | 2.65 | 1.09  | 1.25 | 4.55 | 3.67 | 2.81 | 6.43 | 2.61 | 4.16 |
| CM/(IM+DM + NM) | 272.05 | 0.15  | 0.47 | 1.99 | 1.79 | 2.48 | 4.90 | 0.62 | 0.44 | 1.52 | 1.85 | 0.31  | 0.65 | 0.97 | 13.60 | 0.29 | 0.38 | 0.73 | 1.77 | 0.39 | 0.96 | 1.09 |

- 486 1. (Kim, Kramer, & Hatcher, 2003)<sup>5</sup>  
487 2. (Mopper, Stubbins, Ritchie, Bialk, & Hatcher, 2007)<sup>6</sup>  
488 3. (Podgorski et al., 2012)<sup>7</sup>  
489 4. (D'Andrilli, Foreman, Marshall, & McKnight, 2013)<sup>8</sup>  
490 5. (Minor, Swenson, Mattson, & Oyler, 2014)<sup>9</sup>  
491 6. (Tfaily et al., 2015)<sup>10</sup>  
492 7. (Schmidt, Elvert, Koch, Witt, & Hinrichs, 2009)<sup>11</sup>  
493 8. (Bhatia, Das, Longnecker, Charette, & Kujawinski, 2010)<sup>12</sup>  
494 9. (Lusk & Toor, 2016)<sup>13</sup>  
495 10. (Xu et al., 2013)<sup>14</sup>  
496 11. (Saenger, Cécillon, Sebag, & Brun, 2013)<sup>15</sup>  
497 12. (Liu, Sleighter, Zhong, & Hatcher, 2011)<sup>16</sup>  
498 13. (Wang, Goual, & Colberg, 2012)<sup>17</sup>  
499 14. (Hockaday, Purcell, Marshall, Baldock, & Hatcher, 2009)<sup>18</sup>  
500 15. (Nebbioso & Piccolo, 2013)<sup>19</sup>  
501 16. (Thevenot et al., 2013)<sup>20</sup>  
502 17. (Grannas, Hockaday, Hatcher, Thompson, & Mosley-Thompson, 2006)<sup>21</sup>  
503 18. (Mann et al., 2015)<sup>22</sup>  
504 19. (Stubbins et al., 2010)<sup>23</sup>  
505 20. (Osborne et al., 2013)<sup>24</sup>  
506 21. (Hodgkins et al., 2014)<sup>25</sup>

**Table S-3.** Percentage of database compound exact masses that were correctly, incorrectly and not assigned to the corresponding molecular formula by applying compound identification algorithm (CIA)<sup>4</sup>. The absolute number of is shown in brackets. Correctly assigned formulas excluding the not assigned, and the ratios correctly-assigned/incorrectly-assigned and the correctly-assigned/(incorrectly-assigned + not-assigned) are also shown. The total proportions are shown on the calculations based on the absolute number of compounds in databases and on the relative number of compounds.

|                                | Correctly Assigned | Incorrectly Assigned | Not Assigned | Correctly Assigned excluding Not-Assigned | Correctly Assigned / Incorrectly Assigned ratio | Correctly Assigned / (Incorrectly Assigned + Not Assigned) ratio |
|--------------------------------|--------------------|----------------------|--------------|-------------------------------------------|-------------------------------------------------|------------------------------------------------------------------|
| <b>Lipids</b>                  | 98.08%             | 1.14%                | 0.78%        | 98.08%                                    | 86.03                                           | 51.08                                                            |
| <b>Peptides</b>                | 96.6%              | 3.01%                | 0.03%        | 96.6%                                     | 32.09                                           | 31.78                                                            |
| Non-phosphorilated Peptides    | 98.39%             | 1.58%                | 0.03%        | 98.39%                                    | 62.27                                           | 61.11                                                            |
| Phosphopeptides                | 89.4%              | 10.59%               | 0.01%        | 89.4%                                     | 8.44                                            | 8.43                                                             |
| <b>Amino sugars</b>            | 57.25%             | 34.78%               | 7.97%        | 57.25%                                    | 1.64                                            | 1.34                                                             |
| <b>Carbohydrates</b>           | 100%               | 0%                   | 0%           | 100%                                      | ∞                                               | ∞                                                                |
| <b>Nucleotides</b>             | 70.27%             | 21.62%               | 8.11%        | 70.27%                                    | 3.25                                            | 2.36                                                             |
| <b>Phytochemical compounds</b> | 93.67%             | 5.98%                | 0.35%        | 93.67%                                    | 15.66                                           | 14.8                                                             |
|                                |                    |                      |              |                                           |                                                 |                                                                  |
| <b>TOTAL</b>                   | 96.94%             | 2.84%                | 0.21%        | 96.94%                                    | 34.13                                           | 31.78                                                            |

## Supplementary Figures

**Figure S-1.** Correlation plots of stoichiometric variables (O:C, H:C, N:C, P:C and N:P) for all compound databases (Amino sugars, yellow; Carbohydrates, orange; Lipids, blue; Nucleotides, cyan; Peptides, red; Phytochemical compounds, green; ). Box plots showing the distribution of compounds of each database for each variable are shown, extreme values are shown by dots. Left panels represent the distribution of each of the compounds of each database along the specified stoichiometric variable.

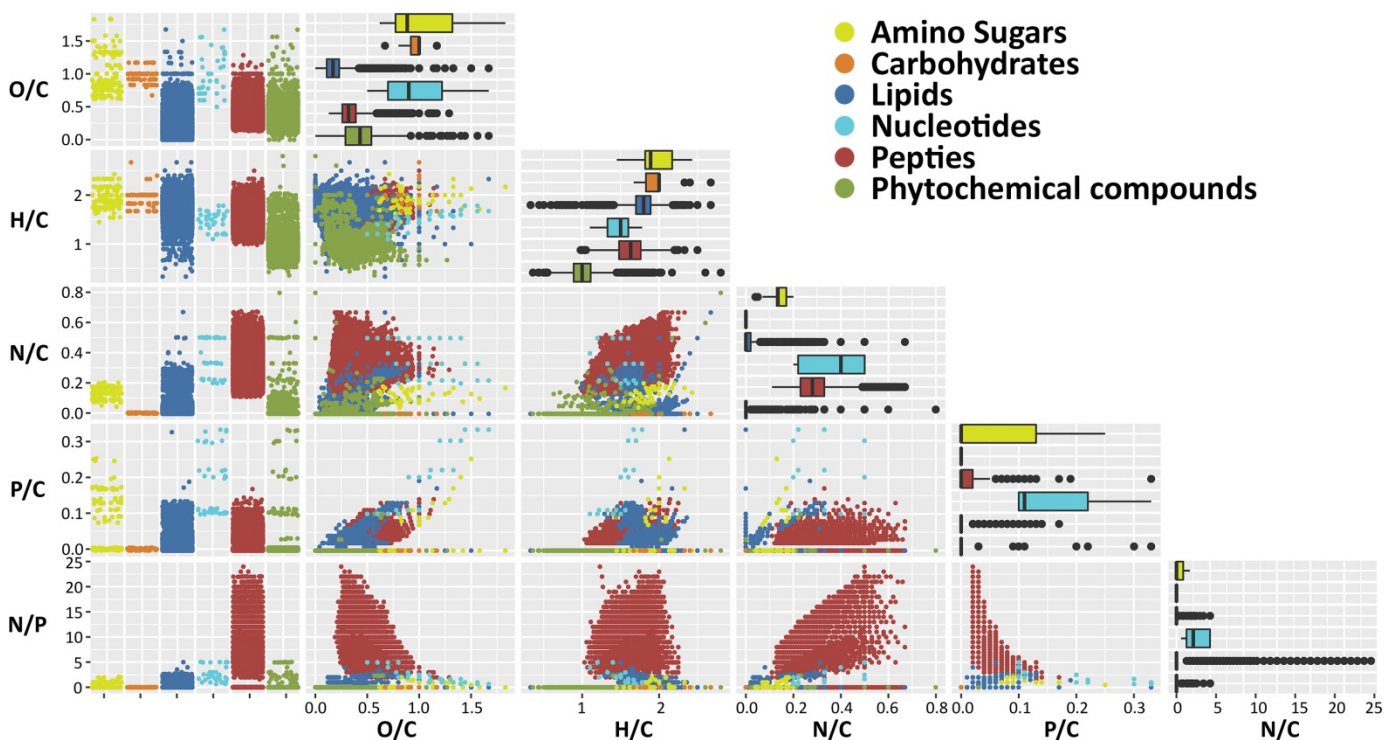

**Figure S-2.** Figure example showing the implemented criteria to determine the threshold value to separate two categories (Lipids and Phytochemical compounds in this example) that showed overlapping in all stoichiometric variables. The stoichiometric variable that showed better separation between the two compound categories was the one considered to discriminate them; H:C ratio in this case. First, a normal distribution fitting was created for each compound category along the selected variable (**a**). The intersection value between both distribution fittings was considered as a reference threshold (**b**). We created 2000 numbers at 0.0001 step value (threshold candidates) above and below the reference threshold value. Each threshold candidate value determines thus a distribution range for each compound category along the variable (H:C); in this example, the variable range below the candidate value corresponds to phytochemical compounds and above corresponds to lipids. For each of the 4,000 threshold candidate values we calculated the proportion of features of each compound category outside their alleged distribution range. Total overlapping distribution along the 4000 threshold candidates for H:C (**c**). The candidate value that separated the two categories with the minimum proportional number of total overlapped compounds (Lipids + Phytochemical compounds) was considered as the cut-off for those compound categories and variable (H:C): 1.32 in this example.

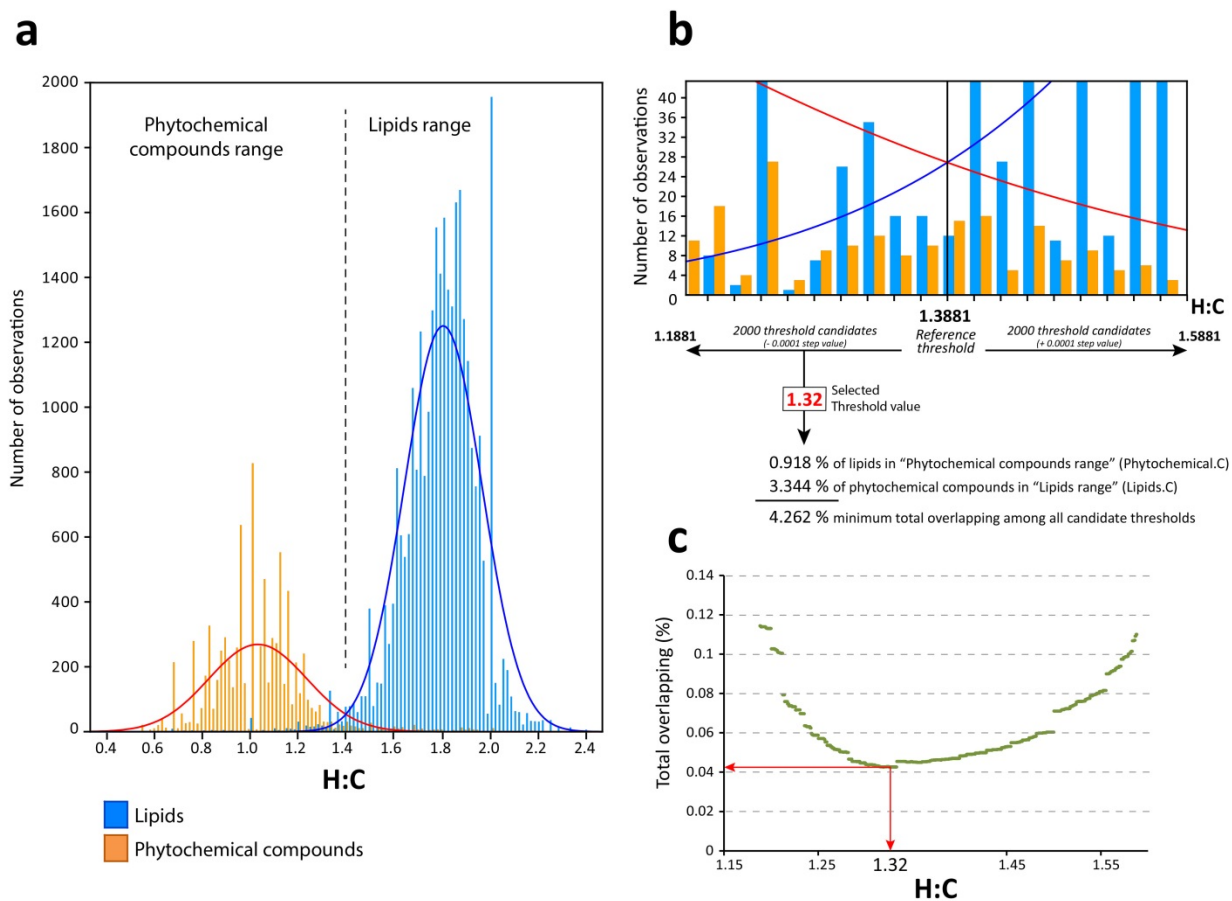

**Figure S-3.** Bidimensional (2D) density plots of H:C vs. O:C, N:C, P:C, and N:P ratios for lipids database (including 30,729 elemental formulas). Color gradient indicates distinct number of features included in each squared area (red squares indicate the areas with higher density of lipids; blue squares indicate the areas with lower density of lipids). Stoichiometric thresholds for each variable (H:C, O:C, N:C, P:C, and N:P) are represented by red dashed lines (see Table 1 of the main text for exact stoichiometric thresholds). Light-blue area indicates the area included in the stoichiometric constraints. The percentage on the top-right corner of the plots indicate the proportion of compounds within the light-blue area (within the MSCC thresholds).

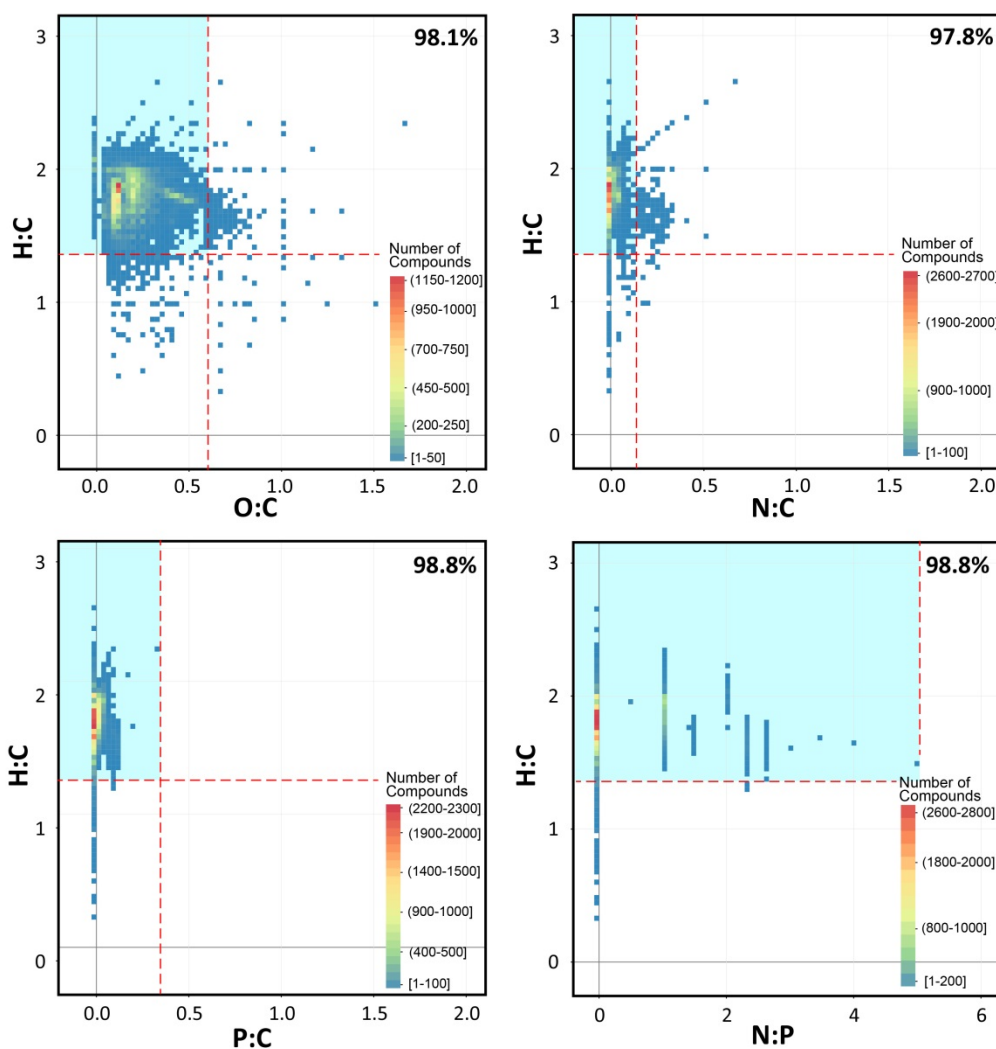

**Figure S-4.** Bidimensional (2D) density plots of H:C vs. O:C, N:C, P:C, and N:P ratios for peptide database (including 93,245 elemental formulas). Color gradient indicates distinct number of features included in each squared area (red squares indicate the areas with higher density of peptides; blue squares indicate the areas with lower density of peptides). Stoichiometric thresholds for each variable (H:C, O:C, N:C, P:C, and N:P) are represented by red dashed lines (constraints 1) and blue dashed lines (constraints 2) (see Table 1 of the main text for exact stoichiometric thresholds). Stoichiometric constraints for Protein category (Protein<sub>c</sub>) is composed by constraints 1 and constraints 2 together. Light-blue area indicates the area included in the stoichiometric constraints. The percentages on the top-right corner of the plots indicate the proportion of compounds within the light-blue area (within the MSCC thresholds).

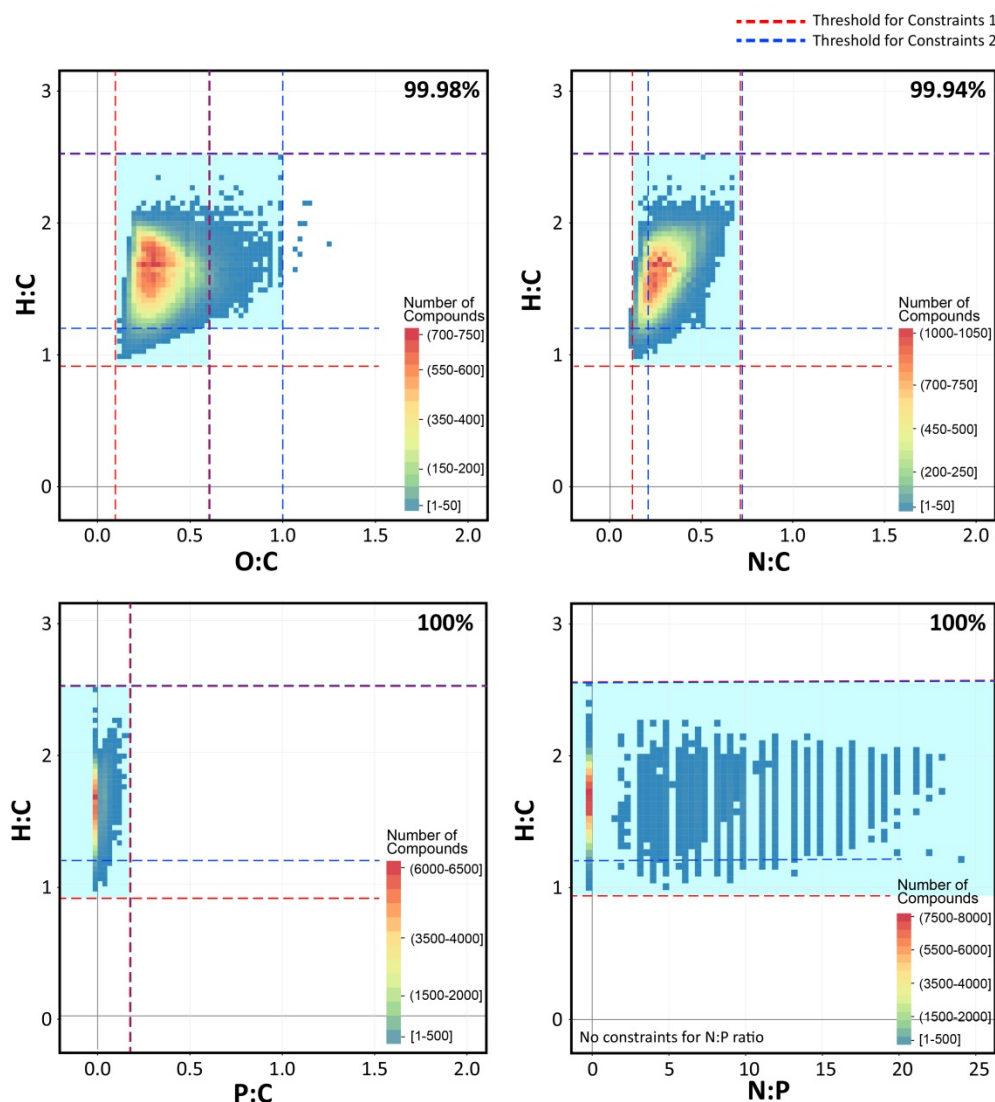

**Figure S-5.** Bidimensional (2D) density plots of H:C vs. O:C, N:C, P:C, and N:P ratios for the phytochemical compounds database (including 7,774 elemental formulas). Color gradient indicates distinct number of features included in each squared area (red squares indicate the areas with higher density of phytochemical compounds; blue squares indicate the areas with lower density of phytochemical compounds). Stoichiometric thresholds for each variable (H:C, O:C, N:C, P:C, and N:P) are represented by red dashed lines (see Table 1 of the main text for exact stoichiometric thresholds). Light-blue area indicates the area included in the stoichiometric constraints. The percentages on the top-right corner of the plots indicate the proportion of compounds within the light-blue area (within the MSCC thresholds).

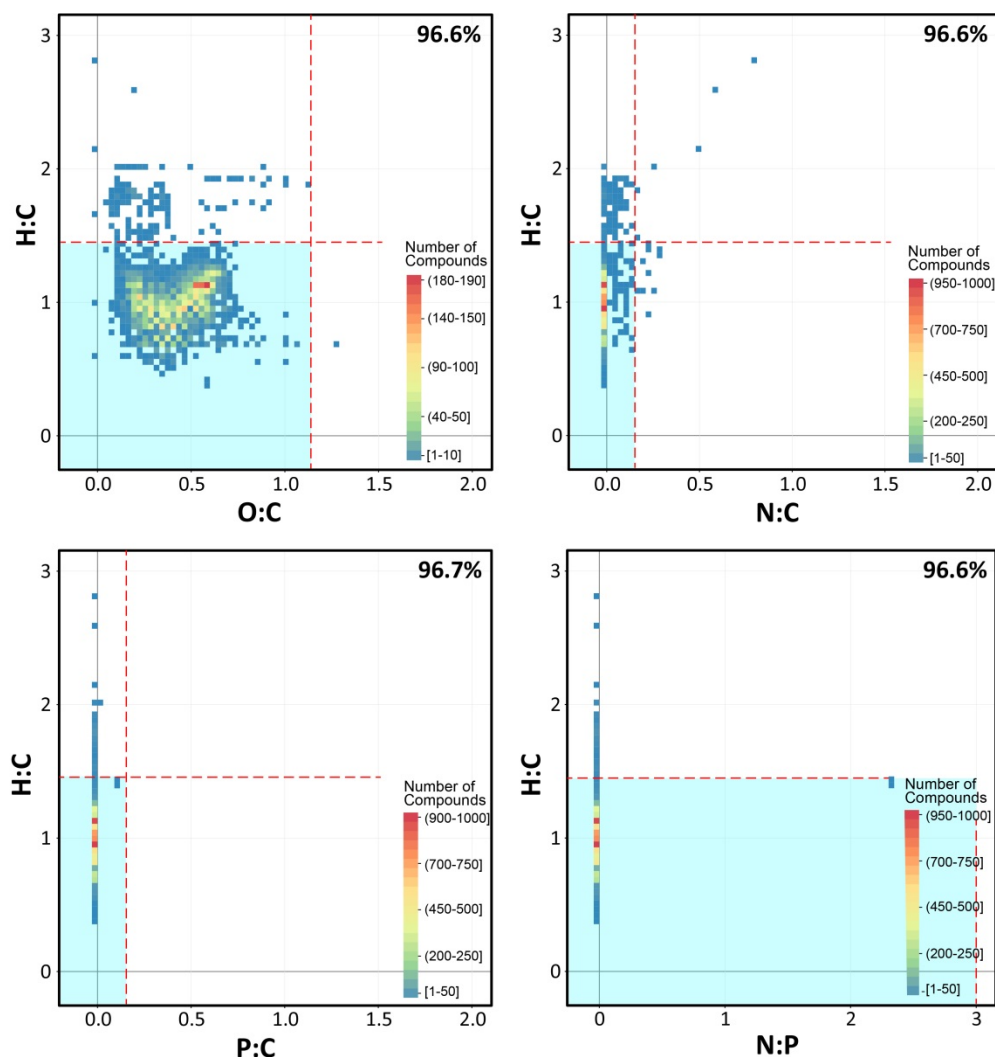

**Figure S-6.** Bidimensional (2D) density plots of H:C vs. O:C, N:C, P:C, and N:P ratios for amino-sugar database (including 142 elemental formulas). Color gradient indicates distinct number of features included in each squared area (red squares indicate the areas with higher density of amino-sugar; blue squares indicate the areas with lower density of amino-sugar). Stoichiometric thresholds for each variable (H:C, O:C, N:C, P:C, and N:P) are represented by red dashed lines (see Table 1 of the main text for exact stoichiometric thresholds). Light-blue area indicates the area included in the stoichiometric constraints. The percentages on the top-right corner of the plots indicate the proportion of compounds within the light-blue area (within the MSCC thresholds).

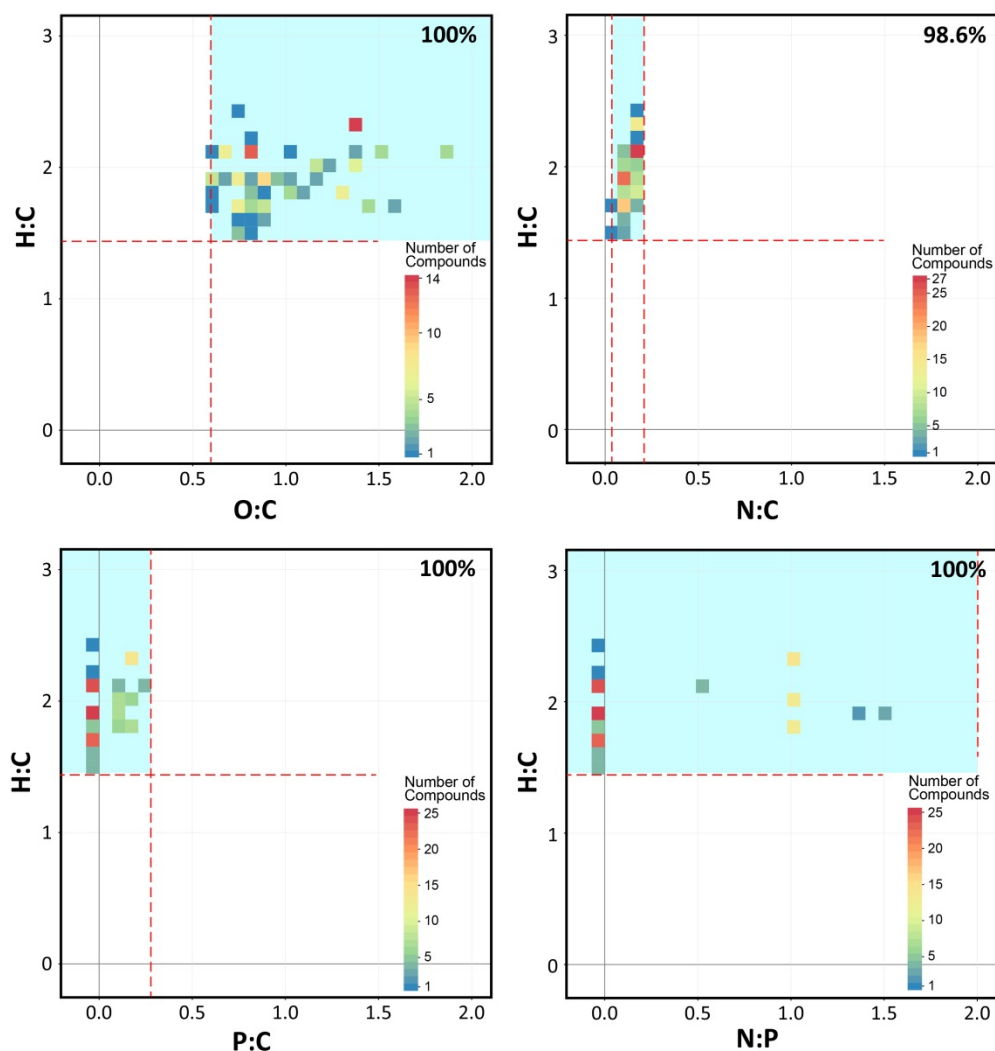



**Figure S-7.** Bidimensional (2D) density plots of H:C vs. O:C ratio for carbohydrate database (including 82 elemental formulas). Color gradient indicates distinct number of features included in each squared area (red squares indicate the areas with higher density of carbohydrates; blue squares indicate the areas with lower density of carbohydrates). Stoichiometric thresholds for each variable (H:C and O:C) are represented by red dashed lines (see Table 1 of the main text for exact stoichiometric thresholds). Light-blue area indicates the area included in the stoichiometric constraints. The percentage on the top-right corner of the plot indicates the proportion of compounds within the light-blue area (within the MSCC thresholds).

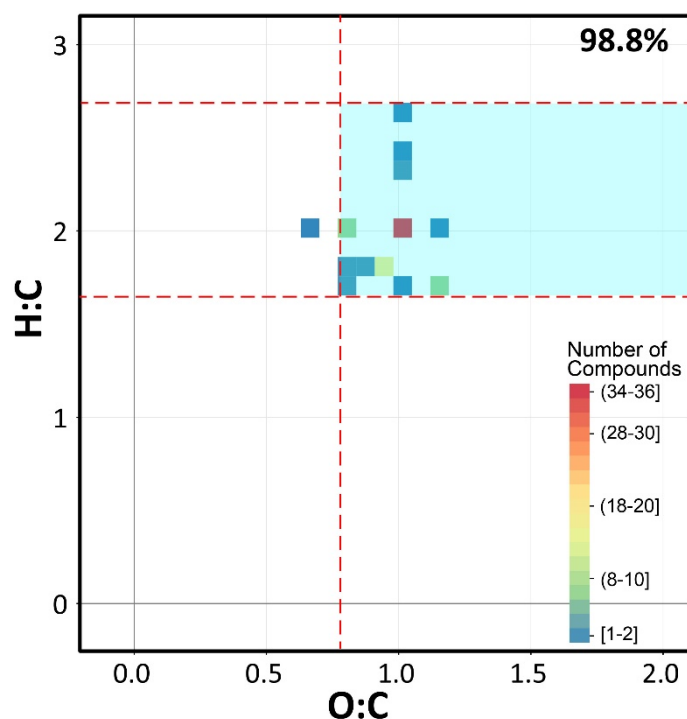

**Figure S-8.** Bidimensional (2D) density plots of H:C vs. O:C, N:C, P:C, and N:P ratios for nucleotide database (including 37 elemental formulas). Color gradient indicates distinct number of features included in each squared area (red squares indicate the areas with higher density of nucleotides; blue squares indicate the areas with lower density of nucleotides). Stoichiometric thresholds for each variable (H:C, O:C, N:C, P:C, and N:P) are represented by red dashed lines (see Table 1 of the main text for exact stoichiometric thresholds). Light-blue area indicates the area included in the stoichiometric constraints. The percentages on the top-right corner of the plots indicate the proportion of compounds within the light-blue area (within the MSCC thresholds).

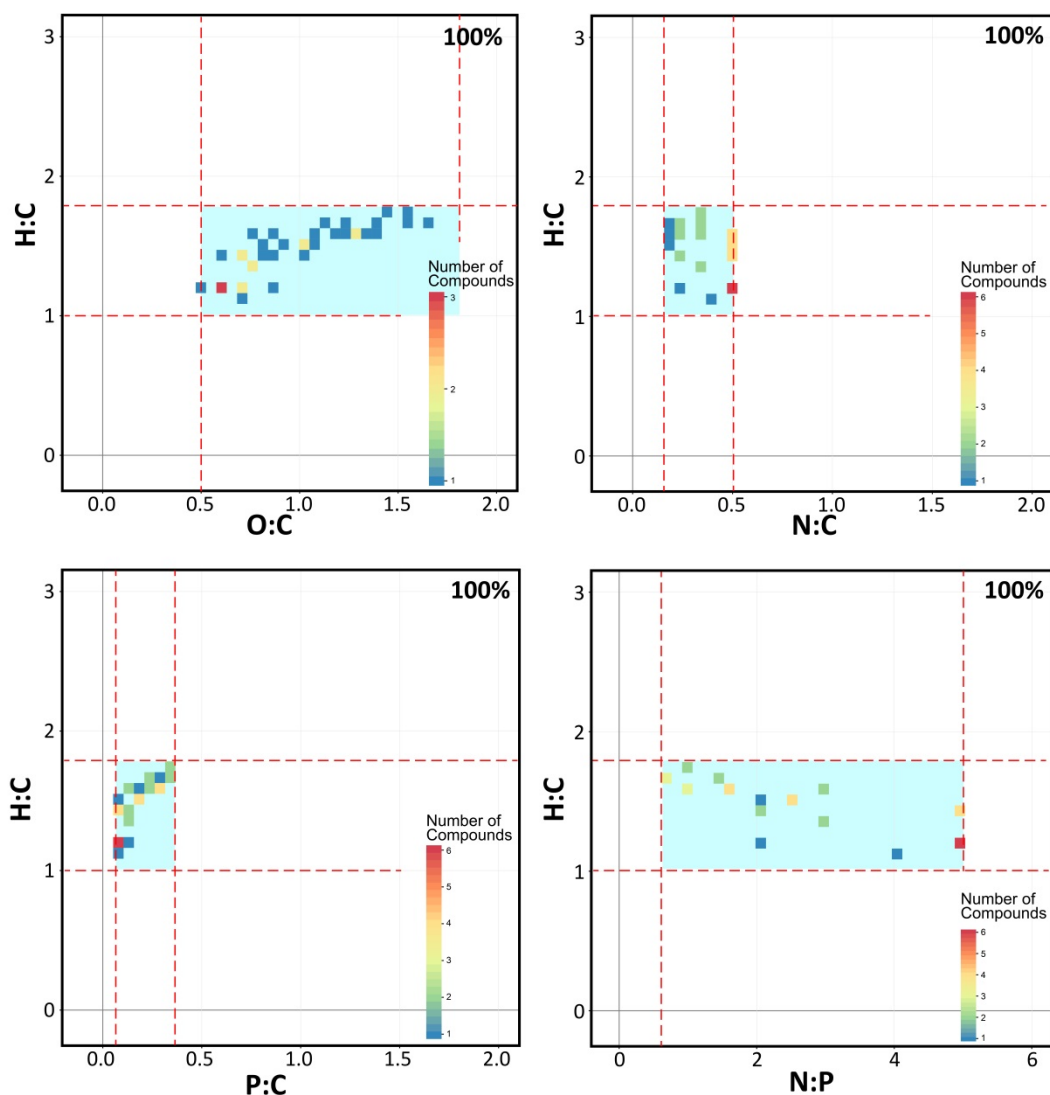

**Figure S-9.** vK diagram (O:C vs H:C) representing the lipid, phytochemical compound and isoprenoid databases. The threshold value separating lipids and phytochemical compounds along H:C is shown by a dashed black line at H:C = 1.32. Box plots for each category compound is shown for H:C variable. First and third percentiles of box plots represent the 10% and 90% of the databases. Dots outside percentiles are considered as outliers.

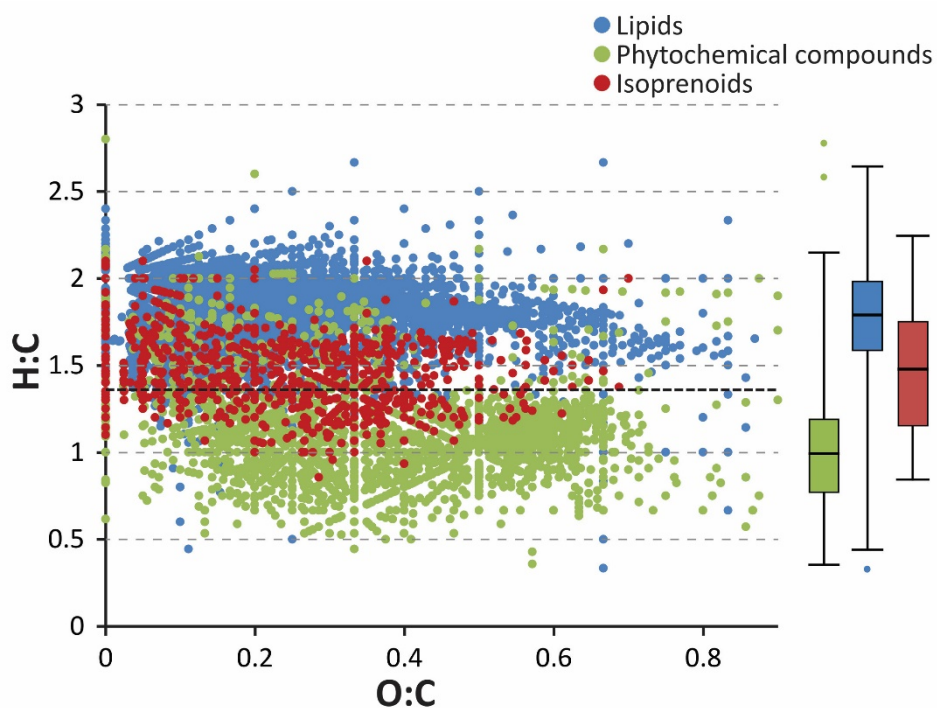

**Figure S-10.** H:C vs. N:C molecular ratios of all peptide (red), lipid (blue) and phytochemical compound (green) databases. Box plots for of each category compound is shown for the stoichiometric variables. First and third percentiles of box plots represent the 10% and 90% of the data. Squares represent the median values and the dots outside the quartiles are outlier compounds for each of the axis. Outliers were determined as the compounds presenting threefold higher values than the third quartile or threefold values lower than the first quartile. In this case we used H:C ratio as the discriminant variable discern lipids from phytochemical compounds while N:C ratio was the discriminant between peptides and the two other categories, especially lipids.

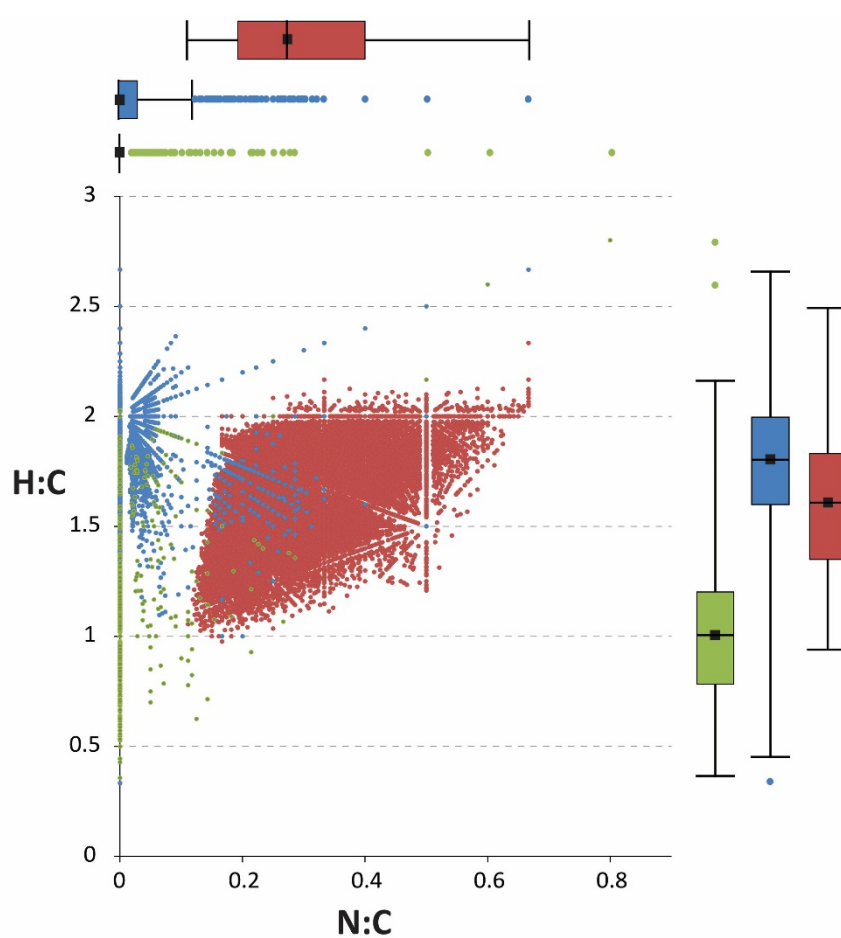

## References Supporting Information

- (1) Fahy, E.; Subramaniam, S.; Murphy, R. C.; Nishijima, M.; Raetz, C. R. H.; Shimizu, T.; Spener, F.; van Meer, G.; Wakelam, M. J. O.; Dennis, E. A. *J. Lipid Res.* **2009**, *50 Suppl* (Supplement), S9-14.
- (2) Roberts, M. F.; Wink, M. *Alkaloids: Biochemistry, Ecology, and Medicinal Applications*, 1st ed.; Roberts, M. F., Wink, M., Eds.; Springer Science+Business Media, LLC: New York, 1998.
- (3) Cimanga, K.; De Bruyne, T.; Pieters, L.; Claeys, M.; Vlietinck, A. *Tetrahedron Lett.* **1996**, *37* (10), 1703–1706.
- (4) Kujawinski, E. B.; Behn, M. D. *Anal. Chem.* **2006**, *78* (13), 4363–4373.
- (5) Kim, S.; Kramer, R. W.; Hatcher, P. G. *Anal. Chem.* **2003**, *75* (20), 5336–5344.
- (6) Mopper, K.; Stubbins, A.; Ritchie, J. D.; Bialk, H. M.; Hatcher, P. G. *Chem. Rev.* **2007**, *107* (2), 419–442.
- (7) Podgorski, D. C.; Hamdan, R.; McKenna, A. M.; Nyadong, L.; Rodgers, R. P.; Marshall, A. G.; Cooper, W. T. *Anal. Chem.* **2012**, *84* (3), 1281–1287.
- (8) D’Andrilli, J.; Foreman, C. M.; Marshall, A. G.; McKnight, D. M. *Org. Geochem.* **2013**, *65*, 19–28.
- (9) Minor, E. C.; Swenson, M. M.; Mattson, B. M.; Oyler, A. R. *Environ. Sci. Process. Impacts* **2014**, *16* (9), 2064–2079.
- (10) Tfaily, M. M.; Chu, R. K.; Tolić, N.; Roscioli, K. M.; Anderton, C. R.; Paša-Tolić, L.; Robinson, E. W.; Hess, N. J. *Anal. Chem.* **2015**, *87* (10), 5206–5215.
- (11) Schmidt, F.; Elvert, M.; Koch, B. P.; Witt, M.; Hinrichs, K.-U. *Geochim. Cosmochim. Acta* **2009**, *73*, 3337–3358.
- (12) Bhatia, M. P.; Das, S. B.; Longnecker, K.; Charette, M. A.; Kujawinski, E. B. *Geochim. Cosmochim. Acta* **2010**, *74*, 3768–3784.
- (13) Lusk, M. G.; Toor, G. S. *Water Res.* **2016**, *96*, 225–235.
- (14) Xu, C.; Chen, H.; Sugiyama, Y.; Zhang, S.; Li, H.-P.; Ho, Y.-F.; Chuang, C.-Y.; Schwehr, K. A.; Kaplan, D. I.; Yeager, C.; Roberts, K. A.; Hatcher, P. G.; Santschi, P. H. *Sci. Total Environ.* **2013**, *449*, 244–252.
- (15) Saenger, A.; Cécillon, L.; Sebag, D.; Brun, J.-J. *Org. Geochem.* **2013**, *54*, 101–114.
- (16) Liu, Z.; Sleigher, R. L.; Zhong, J.; Hatcher, P. G. *Estuar. Coast. Shelf Sci.* **2011**, *92*, 205–216.
- (17) Wang, X.; Goual, L.; Colberg, P. J. S. *J. Hazard. Mater.* **2012**, *217–218* (218), 164–170.
- (18) Hockaday, W. C.; Purcell, J. M.; Marshall, A. G.; Baldock, J. A.; Hatcher, P. G. *Limnol. Oceanogr. Methods* **2009**, *7* (1), 81–95.
- (19) Nebbioso, A.; Piccolo, A. *Anal. Bioanal. Chem.* **2013**, *405* (1), 109–124.

- 706 (20) Thevenot, M.; Dignac, M.-F.; Mendez-Millan, M.; Bahri, H.; Hatté, C.; Bardoux, G.; Rumpel, C. *Biol.*  
707 *Fertil. Soils* **2013**, 49 (5), 517–526.
- 708 (21) Grannas, A. M.; Hockaday, W. C.; Hatcher, P. G.; Thompson, L. G.; Mosley-Thompson, E. J.  
709 *Geophys. Res.* **2006**, 111 (D4), D04304.
- 710 (22) Mann, B. F.; Chen, H.; Herndon, E. M.; Chu, R. K.; Tolic, N.; Portier, E. F.; Roy Chowdhury, T.;  
711 Robinson, E. W.; Callister, S. J.; Wulschleger, S. D.; Graham, D. E.; Liang, L.; Gu, B. *PLoS One* **2015**,  
712 10 (6), e0130557.
- 713 (23) Stubbins, A.; Spencer, R. G. M.; Chen, H.; Hatcher, P. G.; Mopper, K.; Hernes, P. J.; Mwamba, V. L.;  
714 Mangangu, A. M.; Wabakanghanzi, J. N.; Six, J. *Limnol. Oceanogr.* **2010**, 55 (4), 1467–1477.
- 715 (24) Osborne, D. M.; Podgorski, D. C.; Bronk, D. A.; Roberts, Q.; Sipler, R. E.; Austin, D.; Bays, J. S.;  
716 Cooper, W. T. *Rapid Commun. Mass Spectrom.* **2013**, 27 (8), 851–858.
- 717 (25) Hodgkins, S. B.; Tfaily, M. M.; McCalley, C. K.; Logan, T. A.; Crill, P. M.; Saleska, S. R.; Rich, V. I.;  
718 Chanton, J. P. *Proc. Natl. Acad. Sci. U. S. A.* **2014**, 111 (16), 5819–5824.

719
